# Supplementary material for: Total synthesis of a furostan saponin, timosaponin BII
Source: Royal Society of Chemistry journal article supplement (doi:10.1039/b905091d), 2009-01-01
Supplement: b905091d.pdf [file b905091d.pdf]

## SUPPORTING INFORMATION

### Total Synthesis of a furostan saponin, Timosaponin BII

Shuihong Cheng,<sup>a,b</sup> Yuguo Du,<sup>\*,a,b</sup> Baiping Ma,<sup>c</sup> Dawei Tan<sup>c</sup>

<sup>a</sup>State Key Lab of Environmental Chemistry and Ecotoxicology, Research Center for Eco-Environmental Sciences, Chinese Academy of Sciences, Beijing 100085, China

<sup>b</sup>College of Chemistry and Chemical Engineering, Graduate University of Chinese Academy of Sciences, Beijing 100049, China

<sup>c</sup>Beijing Institute of Radiation Medicine, Beijing 100850, China

e-mail: [duyuguo@rcees.ac.cn](mailto:duyuguo@rcees.ac.cn)

Compound 4

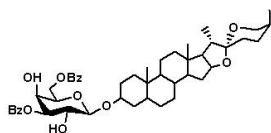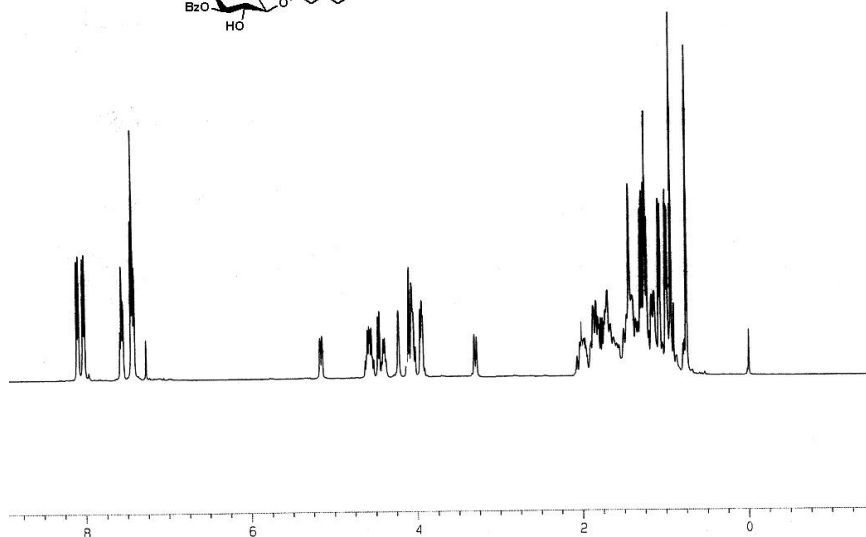

```

F2 - Acquisition Parameters
Date_ 20090427
Time 9.21
INSTRUM AV400
PROBHD 5 mm BBO BB-1H
PULPROG zgpg30
TD 65536
SOLVENT CDCl3
NS 4
DS 0
SWH 11990.407 Hz
FIDRES 0.182959 Hz
AQ 2.7329011 sec
RG 314
DM 41.700 usec
DE 200.000 usec
TE 298.4 K
D1 2.00000000 sec
HOREST 0.00000000 sec
MORR 0.01500000 sec

***** CHANNEL f1 *****
NUC1 1H
P1 12.10 usec
PL1 0.00 dB
SFO1 400.132618 MHz

F1 - Acquisition parameters
ND0 2
TD 256
SFO1 100.6218 MHz
FIDRES 78.81191 Hz
SW 200.001 ppm
PRMODE Echo-Antiecho

F2 - Processing parameters
SI 32768
SF 400.130085 MHz
MDM EM
SSB 0
LB 0.30 Hz
GB 0
PC 1.00

F1 - Processing parameters
SI 1024
PR2 echo-antiecho
SF 100.6128172 MHz
MDM no
SSB 2
LB 0.00 Hz
GB 0

1D NMR plot parameters
CX 20.00 cm
CY 10.00 cm
F1P 9.330 ppm
F1 3733.21 Hz
F2P -1.510 ppm
F2 -604.01 Hz
PRMCH 0.54198 ppm/cm
    
```

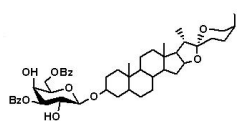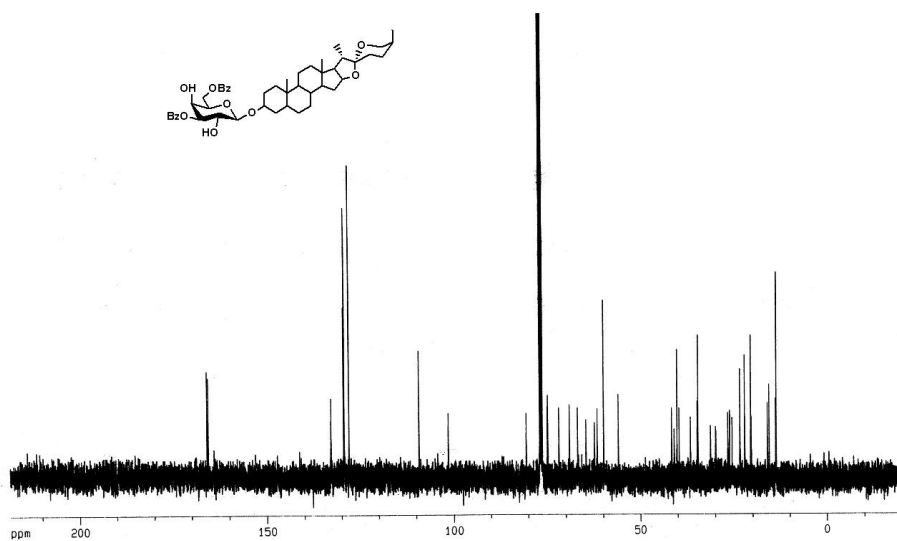

```

F2 - Acquisition Parameters
Date_ 20090427
Time 9.27
INSTRUM AV400
PROBHD 5 mm BBO BB-1H
PULPROG zgpg30
TD 65536
SOLVENT CDCl3
NS 104
DS 0
SWH 23980.814 Hz
FIDRES 0.365919 Hz
AQ 1.3654756 sec
RG 11585.2
DM 20.850 usec
DE 6.00 usec
TE 298.5 K
D1 2.00000000 sec
d11 0.03000000 sec
HOREST 0.00000000 sec
MORR 0.01500000 sec

***** CHANNEL f1 *****
NUC1 13C
P1 12.20 usec
PL1 -1.00 dB
SFO1 100.6228298 MHz

***** CHANNEL f2 *****
CPDPRG2 waltz16
NUC2 1H
PCPD2 80.00 usec
PL2 0.00 dB
PL12 17.30 dB
SFO2 400.1316000 MHz

F2 - Processing parameters
SI 32768
SF 100.6128171 MHz
MDM EM
SSB 0
LB 1.00 Hz
GB 0
PC 1.40

1D NMR plot parameters
CX 23.00 cm
CY 25.00 cm
F1P 218.691 ppm
F1 22003.08 Hz
F2P -19.857 ppm
F2 -1977.74 Hz
PRMCH 10.36294 ppm/cm
HZCH 1042.64417 Hz/cm
    
```

Compound 7

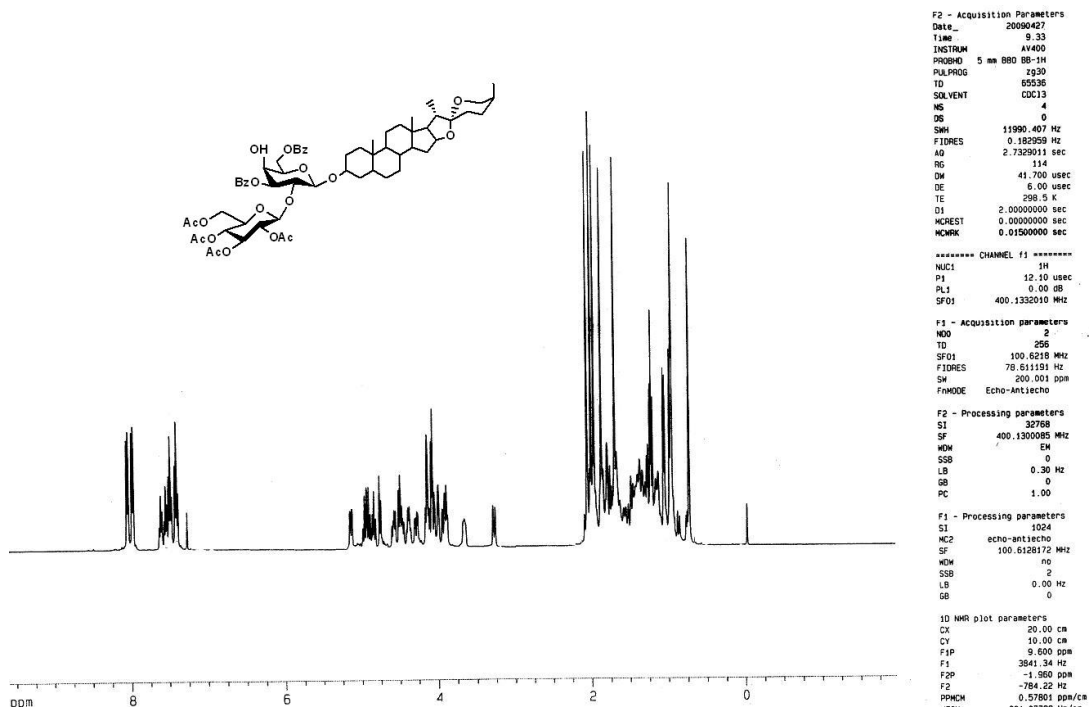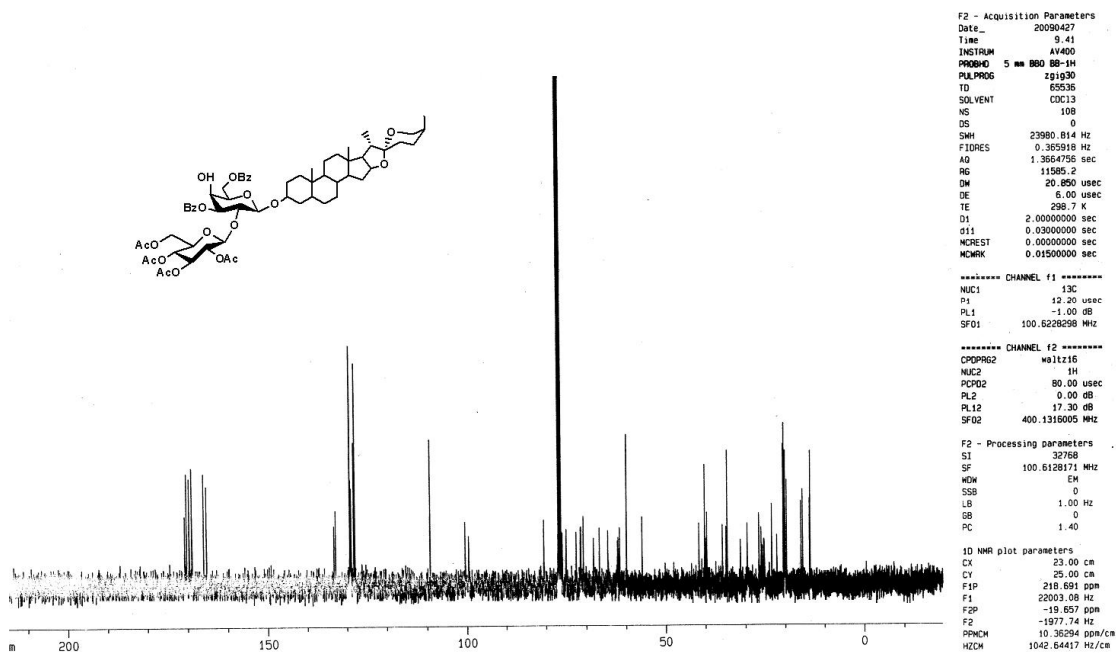

Compound 20

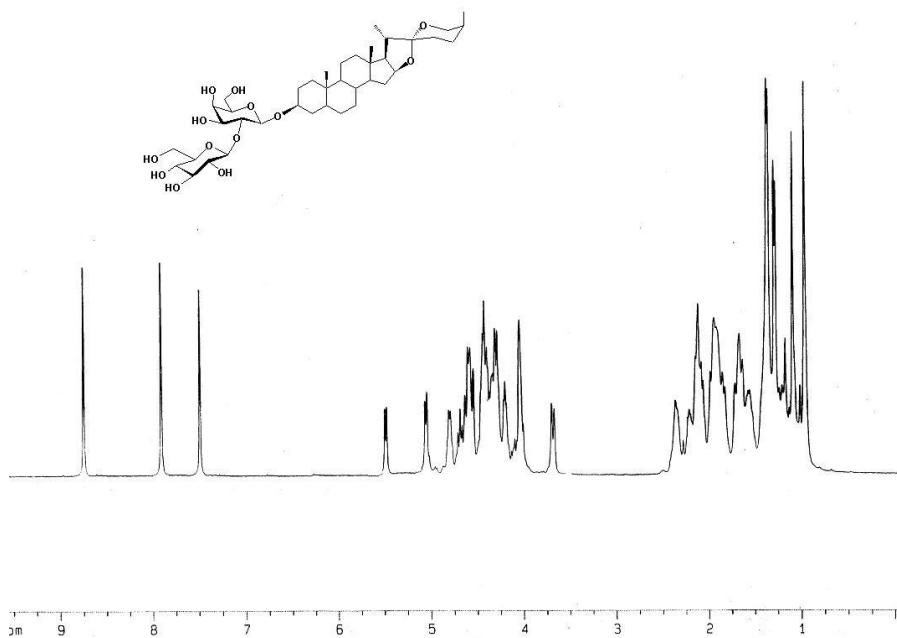

```
F2 - Acquisition Parameters
Date_ 20090427
Time 9.46
INSTRUM AV400
PROBHD 5 mm BBO BB-1H
PULPROG zg30
TD 65536
SOLVENT Pyr
NS 8
DS 0
SMH 11990.407 Hz
FIDRES 0.182959 Hz
AQ 2.7329011 sec
RG 114
DN 41.700 usec
DE 6.00 usec
TE 298.9 K
D1 2.00000000 sec
MCREST 0.00000000 sec
MCWRK 0.01500000 sec

***** CHANNEL f1 *****
NUC1 1H
P1 12.10 usec
PL1 0.00 dB
SFO1 400.1332010 MHz

F1 - Acquisition parameters
ND0 2
TD 256
SFO1 100.6218194 MHz
FIDRES 78.61191 Hz
SW 200.001 ppm
FMODE Echo-Antiecho

F2 - Processing parameters
SI 32768
SF 400.1311833 MHz
WDW EN
SSB 0
LB 0.30 Hz
GB 0
PC 1.00

F1 - Processing parameters
SI 1024
HC2 echo-antiecho
SF 100.6128172 MHz
WDW no
SSB 2
LB 0.00 Hz
GB 0

1D NMR plot parameters
CX 20.00 cm
CY 10.00 cm
F1P 0.687 ppm
F1 3867.96 Hz
F2P -0.092 ppm
F2 -96.73 Hz
PPMCH 0.4873 ppm/cm
HTW 195.23462 Hz/cm
```

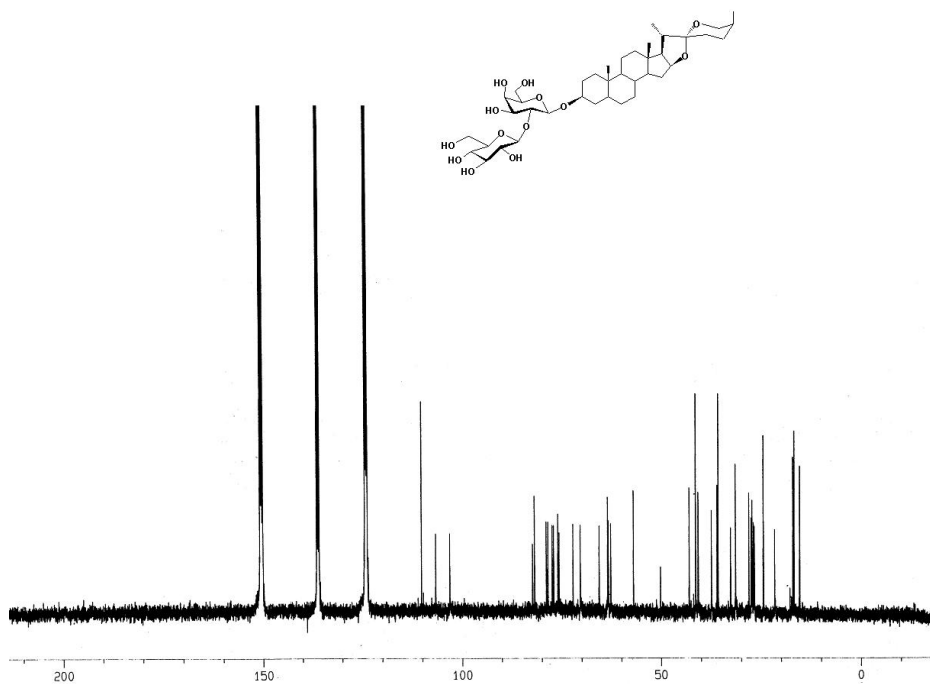

```
F2 - Acquisition Parameters
Date_ 20090429
Time 12.06
INSTRUM AV400
PROBHD 5 mm BBO BB-1H
PULPROG zg30
TD 65536
SOLVENT Pyr
NS 1912
DS 0
SMH 23980.814 Hz
FIDRES 0.35518 Hz
AQ 1.3664756 sec
RG 11585.2
DN 20.850 usec
DE 6.00 usec
TE 298.9 K
D1 2.00000000 sec
D11 0.03000000 sec
MCREST 0.00000000 sec
MCWRK 0.01500000 sec

***** CHANNEL f1 *****
NUC1 13C
P1 12.20 usec
PL1 -1.00 dB
SFO1 100.6228298 MHz

***** CHANNEL f2 *****
CPDPRG2 waltz16
NUC2 1H
PCPD2 80.00 usec
PL2 0.00 dB
PL12 17.30 dB
SFO2 400.1316005 MHz

F2 - Processing parameters
SI 32768
SF 100.6126053 MHz
WDW EN
SSB 0
LB 1.00 Hz
GB 0
PC 1.40

1D NMR plot parameters
CX 23.00 cm
CY 100.00 cm
F1P 219.902 ppm
F1 22124.94 Hz
F2P -18.446 ppm
F2 -1855.87 Hz
PPMCH 10.36295 ppm/cm
HTW 1042.64417 Hz/cm
```

Compound 10

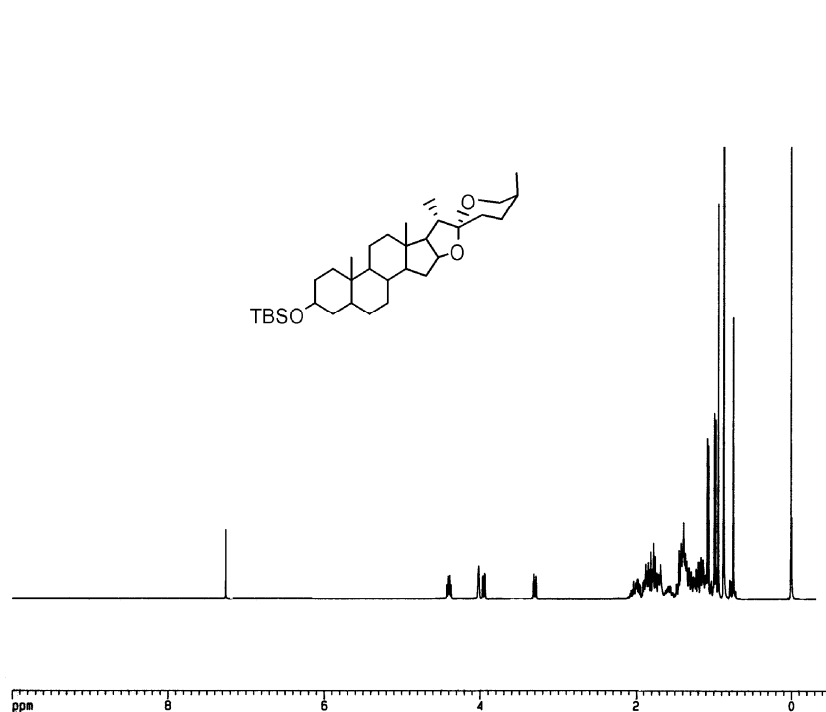

F2 - Acquisition Parameters  
Date\_ 20070424  
Time 15.46  
INSTRUM ARX400  
PROBHD 5 mm Multinu  
PULPROG zg  
TD 32768  
SOLVENT CDCl3  
NS 32  
DS 0  
SWH 7246.377 Hz  
FIDRES 0.221142 Hz  
AQ 2.2610421 sec  
RG 360  
DM 69.000 usec  
DE 98.57 usec  
TE 300.0 K  
D1 2.00000000 sec  
P1 3.00 usec  
DE 98.57 usec  
SF01 400.1318844 MHz  
NUCLEUS 1H

F2 - Processing parameters  
SI 16384  
SF 400.1300091 MHz  
WDW no  
SSB 0  
LB 0.00 Hz  
GB 0  
PC 4.00

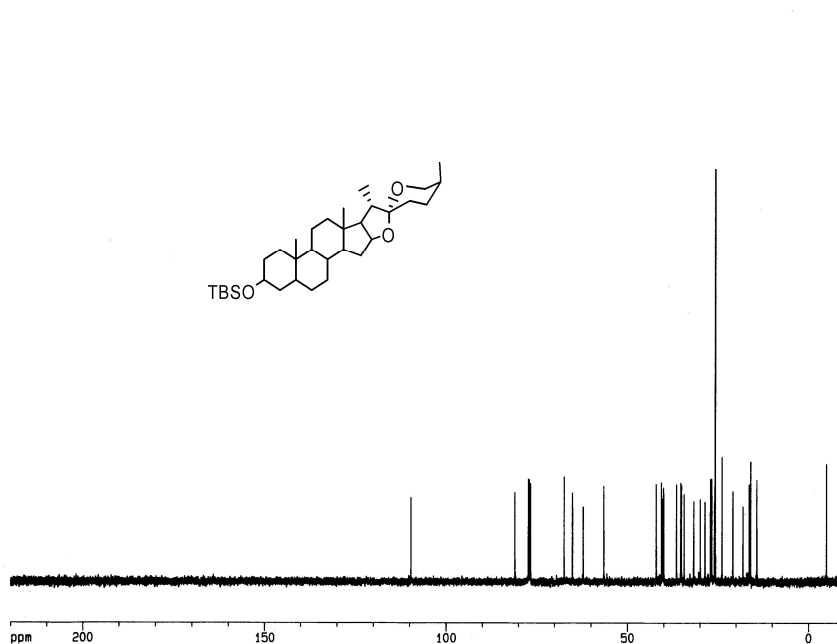

F2 - Acquisition Parameters  
Date\_ 20070704  
Time 16.20  
INSTRUM ARX400  
PROBHD 5 mm Multinu  
PULPROG zgpg  
TD 32768  
SOLVENT CDCl3  
NS 104  
DS 2  
SWH 25000.000 Hz  
FIDRES 0.762938 Hz  
AQ 0.6554100 sec  
RG 8192  
DM 20.000 usec  
DE 25.00 usec  
TE 300.0 K  
D12 0.00002000 sec  
DLS 22.20 dB  
CPDPRG waltz16  
P31 100.00 usec  
D1 2.00000000 sec  
P1 2.50 usec  
DE 25.00 usec  
SF01 100.6263880 MHz  
NUCLEUS 13C  
D11 0.03000000 sec

F2 - Processing parameters  
SI 32768  
SF 100.6127712 MHz  
WDW EM  
SSB 0  
LB 0.50 Hz  
GB 0  
PC 1.00

Compound 13

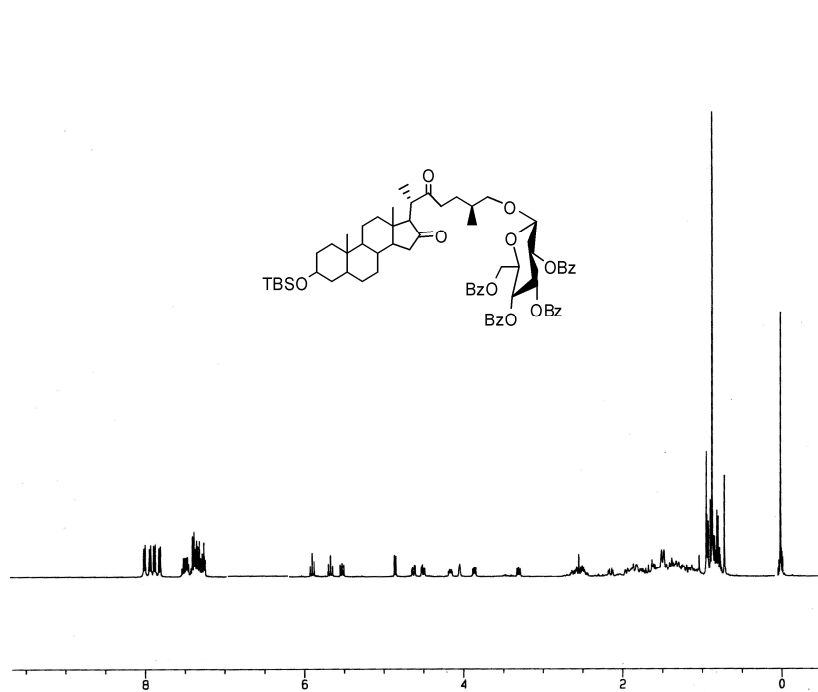

F2 - Acquisition Parameters  
 Date\_ 20070711  
 Time 16.55  
 INSTRUM ARX400  
 PROBHD 5 mm Multinu  
 PULPROG zg  
 TD 32768  
 SOLVENT CDC13  
 NS 39  
 DS 0  
 SMH 6756.757 Hz  
 FIDRES 0.206200 Hz  
 AQ 2.4248819 sec  
 RG 256  
 DW 74.000 usec  
 DE 92.50 usec  
 TE 300.0 K  
 D1 2.0000000 sec  
 P1 3.00 usec  
 DE 92.50 usec  
 SFO1 400.1324000 MHz  
 NUCLEUS 1H

F2 - Processing parameters  
 SI 16384  
 SF 400.1300106 MHz  
 WDW no  
 SSB 0  
 LB 0.00 Hz  
 GB 0  
 PC 0.50

1D NMR plot parameters  
 CX 20.00 cm  
 F1P 10.000 ppm  
 F1 4001.30 Hz  
 F2P -0.500 ppm  
 F2 -200.07 Hz  
 PPMCM 0.52500 ppm/cm  
 HZCM 210.06825 Hz/cm

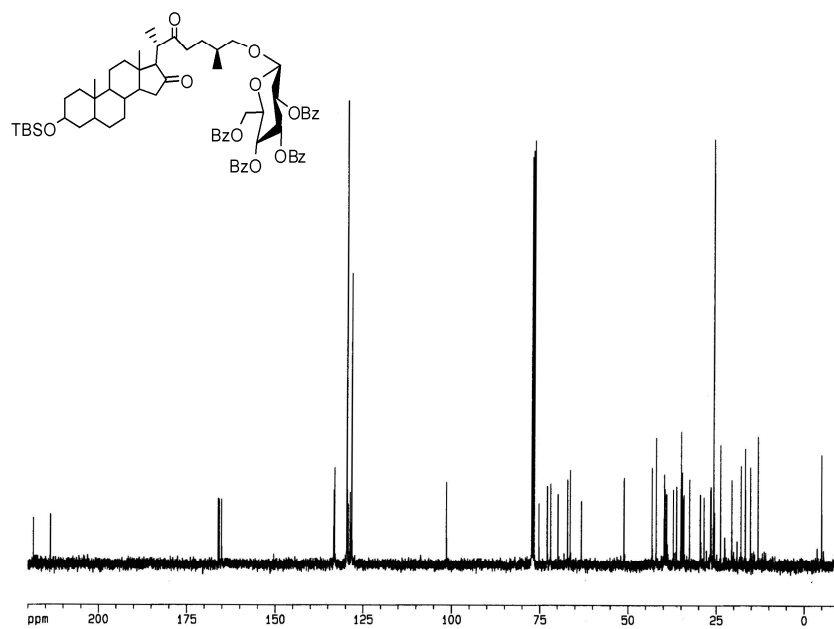

F2 - Acquisition Parameters  
 Date\_ 20070711  
 Time 17.01  
 INSTRUM ARX400  
 PROBHD 5 mm Multinu  
 PULPROG zgdc  
 TD 32768  
 SOLVENT CDC13  
 NS 300  
 DS 0  
 SMH 27777.777 Hz  
 FIDRES 0.847710 Hz  
 AQ 0.5898740 sec  
 RG 8192  
 DW 18.000 usec  
 DE 25.71 usec  
 TE 300.0 K  
 D12 0.00002000 sec  
 DL5 22.20 dB  
 CPUPRG waltz16  
 P31 100.00 usec  
 D1 2.0000000 sec  
 P1 2.50 usec  
 DE 25.71 usec  
 SFO1 100.6240000 MHz  
 NUCLEUS 13C  
 D11 0.03000000 sec

F2 - Processing parameters  
 SI 32768  
 SF 100.6127747 MHz  
 WDW EM  
 SSB 0  
 LB 1.00 Hz  
 GB 0  
 PC 0.30

1D NMR plot parameters  
 CX 20.00 cm  
 F1P 220.000 ppm  
 F1 22134.81 Hz  
 F2P -10.000 ppm  
 F2 -1006.13 Hz  
 PPMCM 11.50000 ppm/cm  
 HZCM 1157.04675 Hz/cm

Compound 14

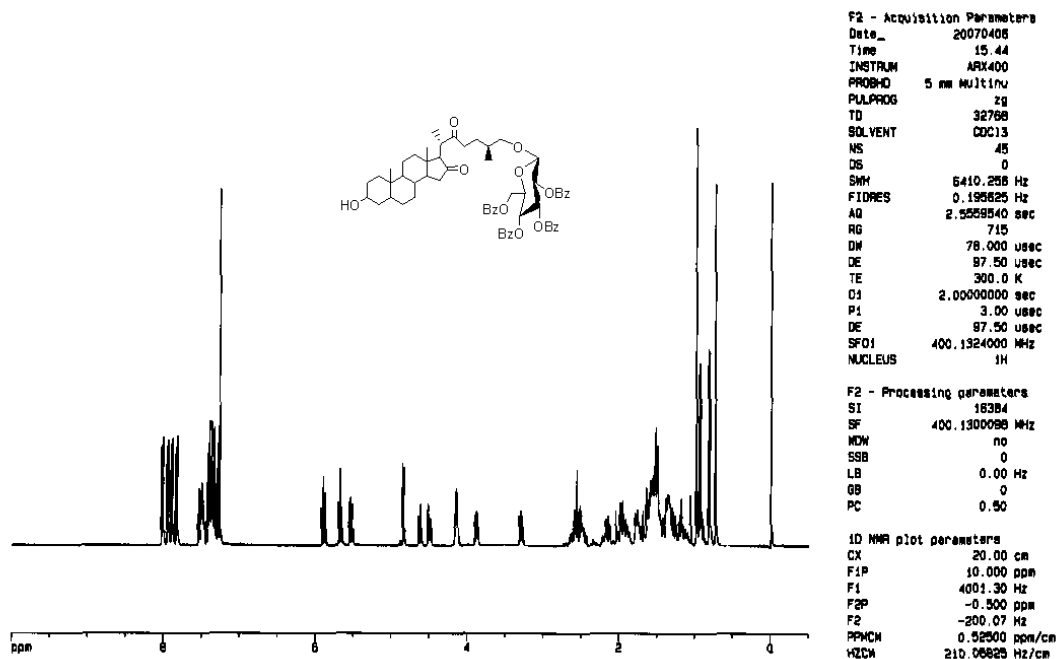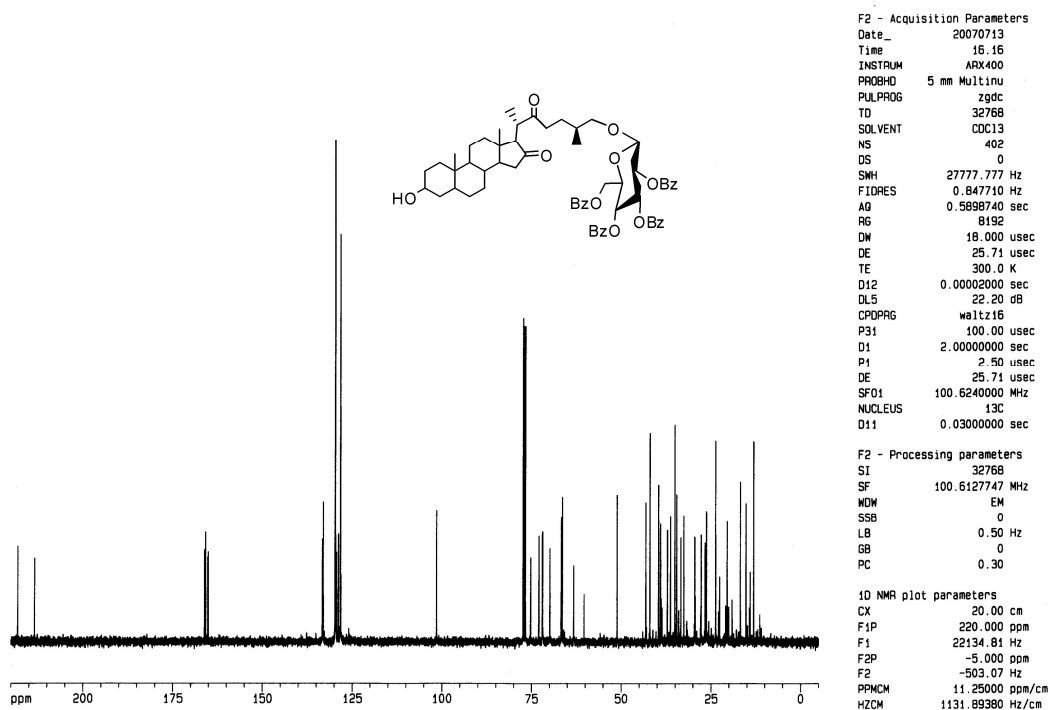

Compound 15

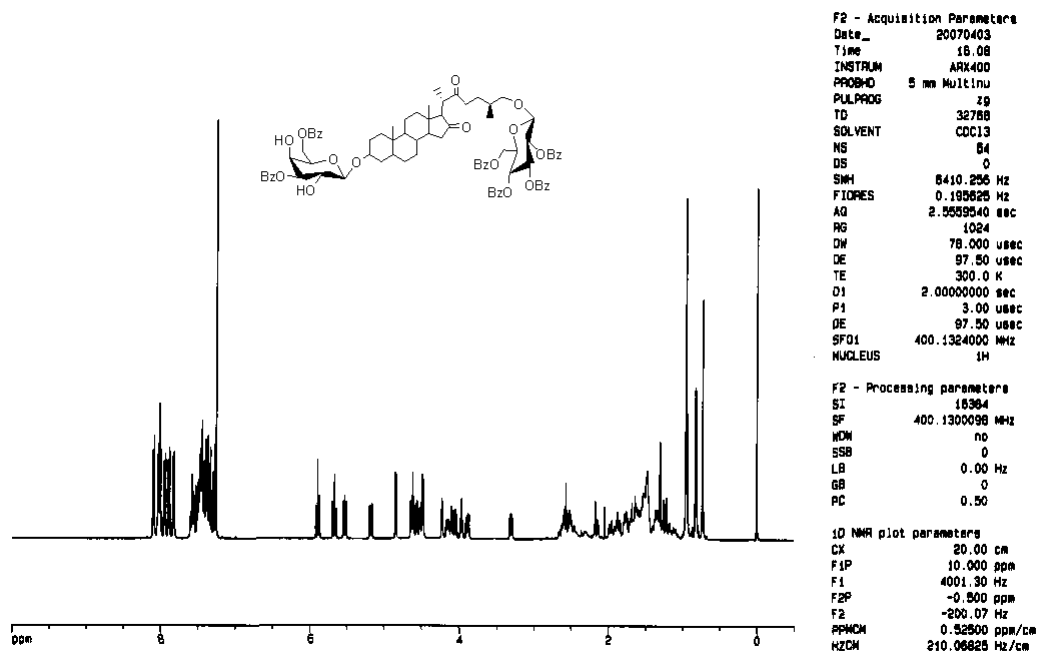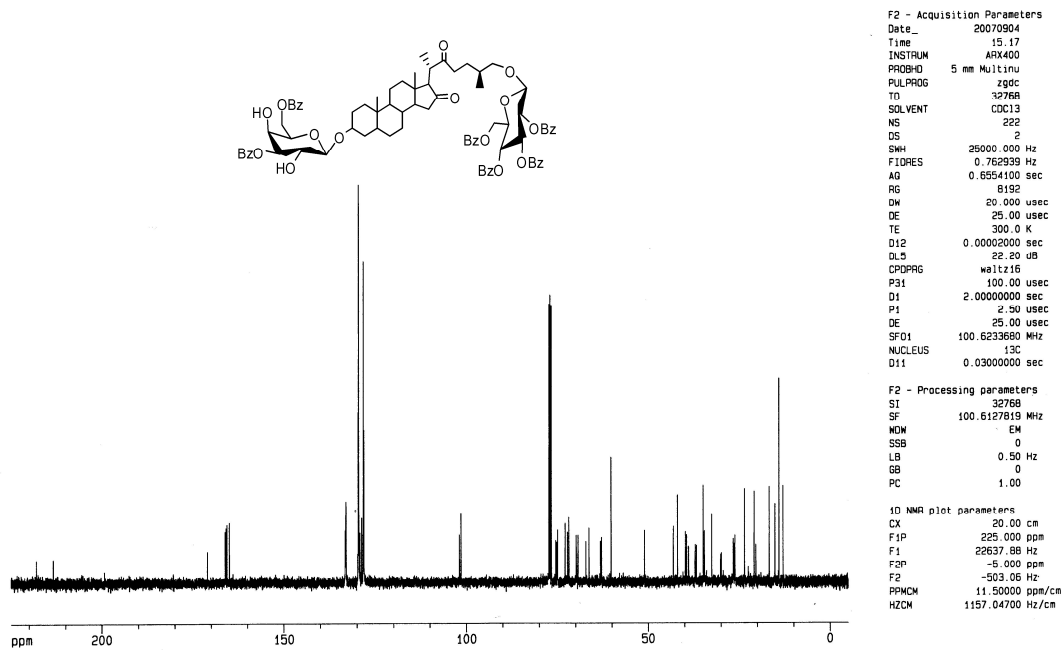



Compound 17

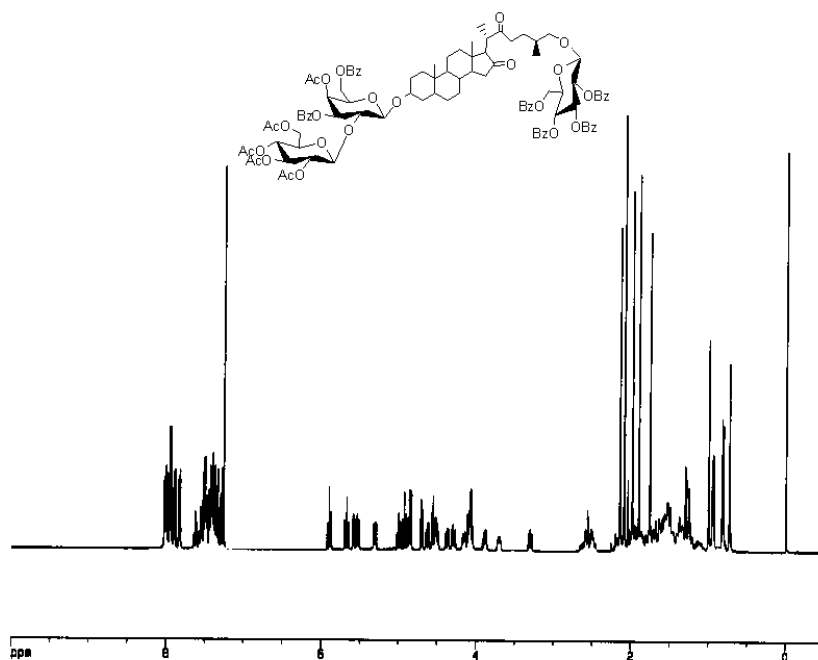

F2 - Acquisition Parameters  
Date\_ 20070403  
Time 16.17  
INSTRUM ARX400  
PROBHD 5 mm Multinu  
PULPROG zg  
TD 32768  
SOLVENT CDCl3  
NS 64  
DS 0  
SWH 8410.256 Hz  
FIDRES 0.198825 Hz  
AQ 2.5659540 sec  
RG 715  
DM 78.000 usec  
DE 97.50 usec  
TE 300.0 K  
D1 2.00000000 sec  
P1 3.00 usec  
DE 97.50 usec  
SFO1 400.1324000 MHz  
NUCLEUS 1H

F2 - Processing parameters  
SI 16384  
SF 400.1300098 MHz  
WDW no  
SSB 0  
LB 0.00 Hz  
GB 0  
PC 0.50

1D NMR plot parameters  
CX 20.00 cm  
F1P 10.000 ppm  
F1 4001.30 Hz  
F2P -0.500 ppm  
F2 -200.07 Hz  
PPMCM 0.52500 ppm/cm  
HZCM 210.06825 Hz/cm

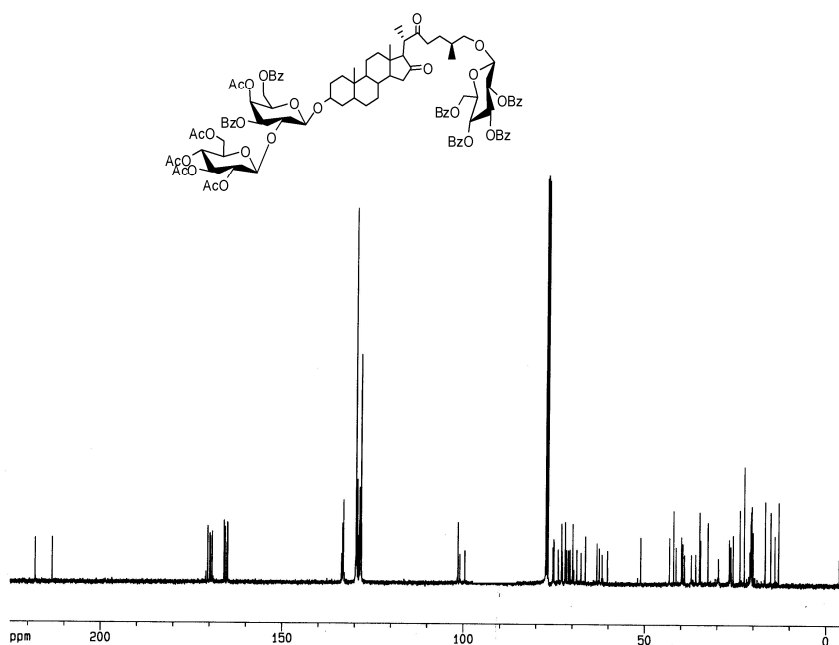

F2 - Acquisition Parameters  
Date\_ 20070605  
Time 19.21  
INSTRUM ARX400  
PROBHD 5 mm Multinu  
PULPROG zgpg  
TD 32768  
SOLVENT CDCl3  
NS 3000  
DS 2  
SWH 25000.000 Hz  
FIDRES 0.762939 Hz  
AQ 0.6554100 sec  
RG 8192  
DM 20.000 usec  
DE 25.00 usec  
TE 300.0 K  
D12 0.00002000 sec  
DL5 22.20 usec  
CPDPRG waltz16  
P31 100.00 usec  
D1 2.00000000 sec  
P1 2.50 usec  
DE 25.00 usec  
SFO1 100.6233680 MHz  
NUCLEUS 13C  
D11 0.03000000 sec

F2 - Processing parameters  
SI 32768  
SF 100.6127750 MHz  
WDW EM  
SSB 0  
LB 0.50 Hz  
GB 0  
PC 1.00

1D NMR plot parameters  
CX 20.00 cm  
F1P 225.000 ppm  
F1 22637.88 Hz  
F2P -5.000 ppm  
F2 -503.06 Hz  
PPMCM 11.50000 ppm/cm  
HZCM 1157.04700 Hz/cm

Compound 18

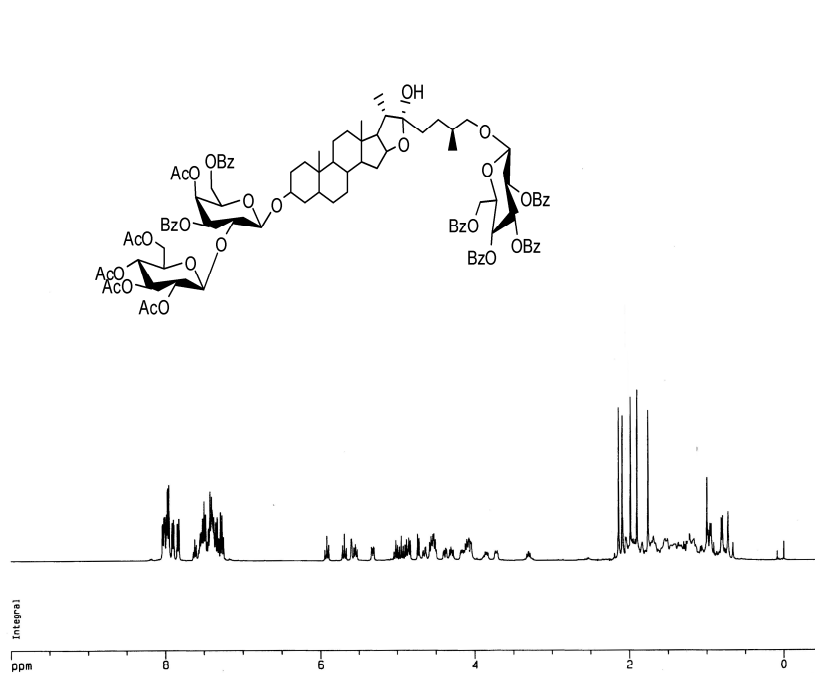

F2 - Acquisition Parameters  
Date\_ 20071017  
Time 10.41  
INSTRUM ARX400  
PROBHD 5 mm Multinu  
PULPROG zg  
TD 32768  
SOLVENT CDC13  
NS 64  
DS 0  
SWH 6410.256 Hz  
FIDRES 0.195625 Hz  
AQ 2.5559540 sec  
RG 128  
DW 78.000 usec  
DE 97.50 usec  
TE 300.0 K  
D1 2.00000000 sec  
P1 3.00 usec  
DE 97.50 usec  
SF01 400.1324000 MHz  
NUCLEUS 1H

F2 - Processing parameters  
SI 16384  
SF 400.1299989 MHz  
WDW no  
SSB 0  
LB 0.00 Hz  
GB 0  
PC 0.50

1D NMR plot parameters  
CX 20.00 cm  
F1P 10.000 ppm  
F1 4001.30 Hz  
F2P -0.500 ppm  
F2 -200.07 Hz  
PPMCM 0.52500 ppm/cm  
HZCM 210.06825 Hz/cm

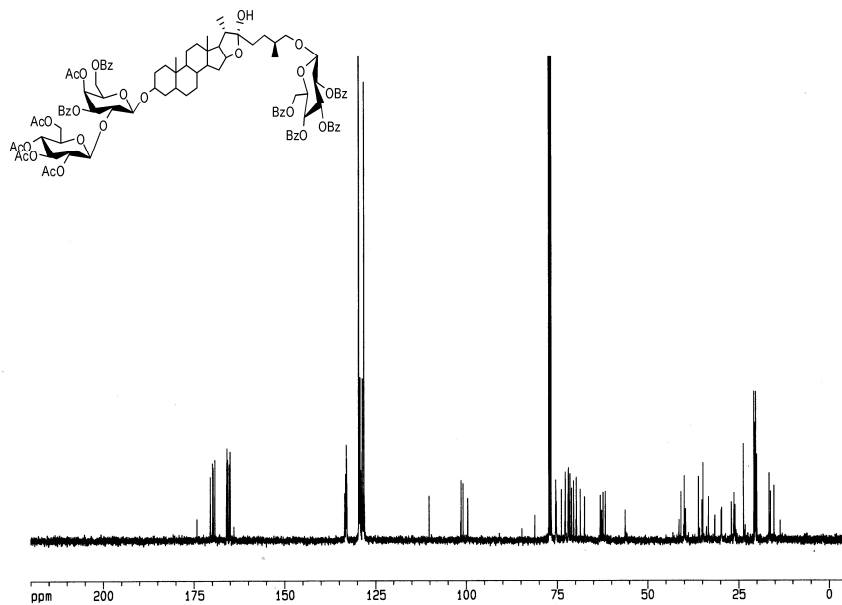

F2 - Acquisition Parameters  
Date\_ 20071017  
Time 10.46  
INSTRUM ARX400  
PROBHD 5 mm Multinu  
PULPROG zgdc  
TD 32768  
SOLVENT CDC13  
NS 950  
DS 0  
SWH 27777.777 Hz  
FIDRES 0.847710 Hz  
AQ 0.5898740 sec  
RG 8192  
DW 18.000 usec  
DE 25.71 usec  
TE 300.0 K  
D12 0.00002000 sec  
DL5 22.20 dB  
CPDPRG waltz16  
P31 100.00 usec  
D1 2.00000000 sec  
P1 2.50 usec  
DE 25.71 usec  
SF01 100.6240000 MHz  
NUCLEUS 13C  
D11 0.03000000 sec

F2 - Processing parameters  
SI 32768  
SF 100.6127840 MHz  
WDW EM  
SSB 0  
LB 0.50 Hz  
GB 0  
PC 0.30

1D NMR plot parameters  
CX 20.00 cm  
F1P 220.000 ppm  
F1 22134.81 Hz  
F2P -5.000 ppm  
F2 -503.07 Hz  
PPMCM 11.25000 ppm/cm  
HZCM 1131.89380 Hz/cm

Compound 1

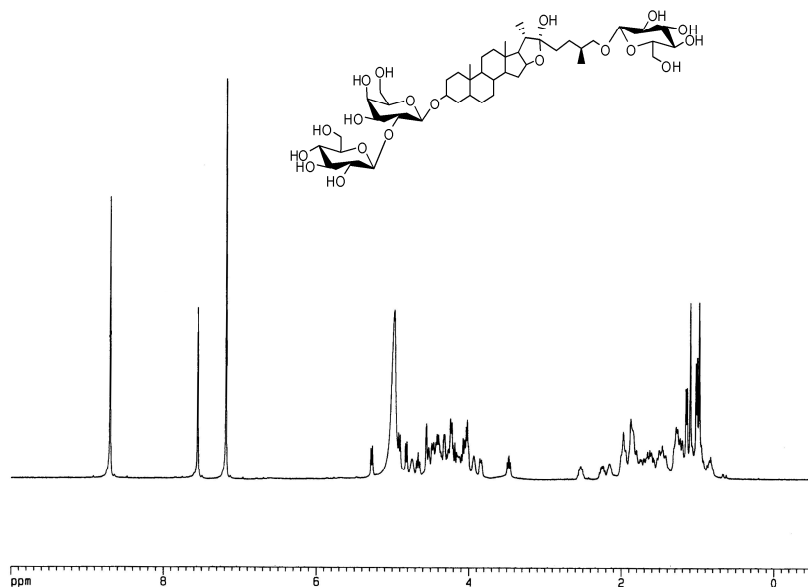

F2 - Acquisition Parameters  
 Date\_ 20070704  
 Time 16.05  
 INSTRUM ARX400  
 PROBHD 5 mm Multinu  
 PULPROG zg  
 TD 32768  
 SOLVENT Pyr  
 NS 32  
 DS 0  
 SWH 7246.377 Hz  
 FIDRES 0.221142 Hz  
 AQ 2.2610421 sec  
 RG 512  
 DW 69.000 usec  
 DE 98.57 usec  
 TE 300.0 K  
 D1 2.00000000 sec  
 P1 3.00 usec  
 DE 98.57 usec  
 SF01 400.1324000 MHz  
 NUCLEUS 1H

F2 - Processing parameters  
 SI 16384  
 SF 400.1304571 MHz  
 WDW no  
 SSB 0  
 LB 0.00 Hz  
 GB 0  
 PC 4.00

1D NMR plot parameters  
 CX 20.00 cm  
 F1P 10.000 ppm  
 F1 4001.30 Hz  
 F2P -0.500 ppm  
 F2 -200.07 Hz  
 PPMCM 0.52500 ppm/cm  
 HZCM 210.06850 Hz/cm

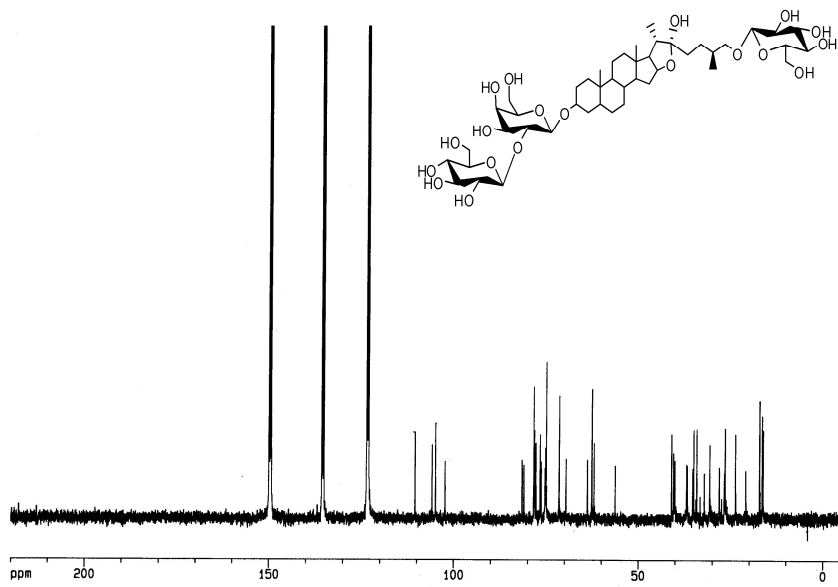

F2 - Acquisition Parameters  
 Date\_ 20070612  
 Time 16.21  
 INSTRUM ARX400  
 PROBHD 5 mm Multinu  
 PULPROG zgdc  
 TD 32768  
 SOLVENT Pyr  
 NS 708  
 DS 0  
 SWH 27777.777 Hz  
 FIDRES 0.847710 Hz  
 AQ 0.5898740 sec  
 RG 8192  
 DW 18.000 usec  
 DE 25.71 usec  
 TE 300.0 K  
 D12 0.00002000 sec  
 DL5 22.20 dB  
 CPDPRG waltz16  
 F31 100.00 usec  
 D1 2.00000000 sec  
 P1 3.00 usec  
 DE 25.71 usec  
 SF01 100.6240000 MHz  
 NUCLEUS 13C  
 D11 0.03000000 sec

F2 - Processing parameters  
 SI 16384  
 SF 100.6129118 MHz  
 WDW EM  
 SSB 0  
 LB 1.00 Hz  
 GB 0  
 PC 0.30

1D NMR plot parameters  
 CX 20.00 cm  
 F1P 220.000 ppm  
 F1 22134.84 Hz  
 F2P -5.000 ppm  
 F2 -503.07 Hz  
 PPMCM 11.25000 ppm/cm  
 HZCM 1131.89526 Hz/cm
